# Supplementary material for: The dual role of necrostatin-1 in Parkinson’s disease models
Source: PubMed Central journal article supplement — Neural Regen Res. 2021 Feb 19;16(10):2019–20. doi: 10.4103/1673-5374.308080 (PMC8343318; doi:10.4103/1673-5374.308080), 2021-02-19
Supplement: NRR-16-2019_Suppl1.pdf [file NRR-16-2019_Suppl1.pdf]

## OPEN PEER REVIEW REPORT 1

**Name of journal:** Neural Regeneration Research

**Manuscript NO:** NRR-D-20-00760

**Title:** The dual role of necrostatin-1 in Parkinson's disease models

**Reviewer's Name:** Abraam M. Yakoub

**Reviewer's country:** USA

### COMMENTS TO AUTHORS

1. Can the authors put a couple of introductory paragraphs to introduce the readers to the different mechanisms of cell death like apoptosis, necrosis, necroptosis and autophagy, and implications of each cell death type in neuronal survival and brain diseases, so that uninformed readers can understand the topic and the paper better.
2. Line 55: "However, Goodall et al. suggested that the autophagy machinery could control this switching (Goodall et al 57 2016)". Can the authors summarize that important paper in more details. This is an important statement that needs further explanation?
3. Line 101: "Because we cannot suggest a neuroprotective effect of Nec-1 if, while inhibiting necroptosis, it increases apoptosis or necrosis.". Does this sentence need to be combined with the preceding sentence in the text?
